# Supplementary material
Source: publisher figshare collection journal article supplement (https://tandf.figshare.com/ndownloader/files/22449464)
Supplement: Supplementary file 1 [file 22449464]

OARS Referral Booklets – Protocol for Assessment

For the information recorded:

1. Is pertinent clinical information recorded? Y/N
2. Would one be able to provide further advice if asked to follow-up? Y/N
3. Were scan findings/pertinent blood results recorded? Y/N
4. Was a question/purpose/intent for referral apparent? Y/N

If the answer is No to any of the above the “Sufficient info” column is marked No.

------------------------------

The presence/absence of identifying features etc (name, dob, ref hospital etc) is not included as part of this judgement.
